# Supplementary material for: Oncogenic hijacking of a conserved hsa_circ_0005140/miR-762/NFIX axis drives retinoblastoma proliferation through context-dependent activation
Source: Research Square preprint supplement (doi:10.21203/rs.3.rs-8392296/v1), 2026-01-19
Supplement: Supplementary file 1 [file d8652d92df988360f28dc72b.xlsx]

## Sheet: Tumor Volume
项目编号：		KM20240603-LJH
动物入室时间：		2024.06.25
Tumor Volume（mm3）
接种细胞量：		1*10∧7 Cells/mouse
细胞	接种时间	动物标号	4	6	8	10	12	14	16	18	21
			2024.07.14	2024.07.16	2024.07.18	2024.07.20	2024.07.22	2024.07.24	2024.07.26	2024.07.28	2024.07.31
Y79-OE-NC	2024.07.10	201	0	4.80899	25.9837	72.6859	129.211	221.885	333.618	449.235	547.648
		202	0	3.75239	20.9654	60.7804	91.8442	210.262	305.293	432.075	528.671
		203	0	4.12029	23.3952	67.3486	115.415	219.806	307.742	444.248	537.244
		204	0	3.90458	17.6024	56.2892	104.524	205.99	300.916	412.554	514.062
		205	0	3.5454	17.82	56.0105	111.463	207.648	303.946	414.445	501.18
		AVG	0	4.02633	21.1533	62.6229	110.491	213.118	310.303	430.512	525.761
		SD	0	0.485422	3.60953	7.26001	13.7743	7.25368	13.2643	16.7504	18.4422
Y79-C5140-OE	2024.07.10	动物标号	4	6	8	10	12	14	16	18	21
			2024.07.14	2024.07.16	2024.07.18	2024.07.20	2024.07.22	2024.07.24	2024.07.26	2024.07.28	2024.07.31
		206	0	12.919	94.657	247.885	386.742	641.734	770.979	871.035	1063.87
		207	0	18.9974	148.535	326.455	523.487	752.374	881.935	987.754	1269.88
		208	0	15.3265	104.094	272.342	468.983	705.219	829.891	931.614	1109.49
		209	0	10.2851	90.0253	229.099	365.414	609.82	726.094	848.534	993.027
		210	0	15.7756	124.411	310	498.022	733.73	857.966	936.962	1115.36
		AVG	0	14.6607	112.344	277.156	448.53	688.575	813.373	915.18	1110.33
		SD	0	3.26623	24.1578	40.9223	69.3045	60.792	63.9862	55.6819	101.737
Y79-C5140-OE+miR-762mimics	2024.07.10	动物标号	4	6	8	10	12	14	16	18	21
			2024.07.14	2024.07.16	2024.07.18	2024.07.20	2024.07.22	2024.07.24	2024.07.26	2024.07.28	2024.07.31
		211	0	9.8402	74.9553	145.915	269.676	489.894	643.363	773.699	848.375
		212	0	11.9758	39.5878	116.243	209.914	421.883	591.499	678.863	774.253
		213	0	12.6299	78.3919	166.991	282.708	500.339	657.528	799.194	859.46
		214	0	10.289	57.5831	120.625	221.027	432.96	608.804	698.618	834.464
		215	0	11.3206	64.1302	133.82	240.653	454.541	640.37	729.18	837.1
		AVG	0	11.2111	62.9296	136.719	244.796	459.923	628.313	735.911	830.73
		SD	0	1.15537	15.4804	20.5405	31.0452	34.4049	27.2086	50.3071	33.0944
Y79-SH-NC	2024.07.10	动物标号	4	6	8	10	12	14	16	18	21
			2024.07.14	2024.07.16	2024.07.18	2024.07.20	2024.07.22	2024.07.24	2024.07.26	2024.07.28	2024.07.31
		216	0	3.94051	33.3634	69.9488	127.67	240.312	341.291	442.506	540.859
		217	0	3.61669	24.6016	56.3359	118.664	224.296	305.517	434.816	515.465
		218	0	4.42041	32.3298	57.5532	123.414	234.465	315.931	435.417	522.361
		219	0	4.33406	35.1201	71.2923	148.165	244.445	344.322	430.2	530.778
		220	0	3.17982	37.6339	69.9782	125.585	248.478	343.419	479.04	543.581
		AVG	0	3.8983	32.6098	65.0217	128.699	238.399	330.096	444.396	530.609
		SD	0	0.514728	4.90715	7.40584	11.3832	9.43606	18.0969	19.8603	11.945
Y79-C5140-SH	2024.07.10	动物标号	4	6	8	10	12	14	16	18	21
			2024.07.14	2024.07.16	2024.07.18	2024.07.20	2024.07.22	2024.07.24	2024.07.26	2024.07.28	2024.07.31
		221	0	1.57115	5.92	22.7225	42.88	55.6224	70.9701	79.8336	90.1977
		222	0	2.97124	14.0967	45.431	97.8084	142.869	187.326	220.123	240.745
		223	0	3.54646	17.2291	56.2606	106.252	167.225	197.192	224.277	250.55
		224	0	2.3548	11.2847	41.0832	79.1907	121.716	182.538	216.078	230.447
		225	0	1.95198	8.13755	31.6323	47.9299	75.1544	96.2068	111.453	122.993
		AVG	0	2.47913	11.3336	39.4259	74.8121	112.517	146.847	170.353	186.986
		SD	0	0.790435	4.52537	12.8643	28.6302	46.4538	58.6701	69.1712	74.6365
Y79-C5140-SH+miR-762inhibitor	2024.07.10	动物标号	4	6	8	10	12	14	16	18	21
			2024.07.14	2024.07.16	2024.07.18	2024.07.20	2024.07.22	2024.07.24	2024.07.26	2024.07.28	2024.07.31
		226	0	2.89561	28.9764	46.7591	114.033	187.649	217.007	244.001	274.762
		227	0	3.49875	29.0255	46.6478	115.602	181.787	213.183	241.97	274.066
		228	0	3.33246	28.0679	47.5039	112.363	179.668	220.161	240.281	266.593
		229	0	3.2637	29.2949	48.7165	114.215	182.404	214.16	237.557	268.866
		230	0	3.70406	35.9941	65.3745	136.285	216.201	262.26	302.316	349.386
		AVG	0	3.33891	30.2718	51.0003	118.5	189.542	225.354	253.225	286.735
		SD	0	0.300458	3.23217	8.07759	10.0085	15.1895	20.8093	27.5441	35.1925

## Sheet: D4
项目编号：		KM20240603-LJH
动物入室时间：		2024.06.25
测量日期：		2024.07.14
细胞	接种时间	标号	右侧肿瘤			体重（g）
			最长径（mm）	最短径（mm）	肿瘤体积（mm3）
Y79-OE-NC	2024.07.10	201	0	0	0	15.7
		202	0	0	0	15.4
		203	0	0	0	15.2
		204	0	0	0	15.4
		205	0	0	0	15.6
		AVG			0	15.46
		SD			0	0.194936
Y79-C5140-OE	2024.07.10	206	0	0	0	15.3
		207	0	0	0	15.5
		208	0	0	0	15.7
		209	0	0	0	15.1
		210	0	0	0	15.7
		AVG			0	15.46
		SD			0	0.260768
Y79-C5140-OE+miR-762mimics	2024.07.10	211	0	0	0	15.8
		212	0	0	0	15.4
		213	0	0	0	15.2
		214	0	0	0	15.2
		215	0	0	0	15.3
		AVG			0	15.38
		SD			0	0.248998
Y79-SH-NC	2024.07.10	216	0	0	0	15.7
		217	0	0	0	14.9
		218	0	0	0	15.2
		219	0	0	0	15.1
		220	0	0	0	15.7
		AVG			0	15.32
		SD			0	0.363318
Y79-C5140-SH	2024.07.10	221	0	0	0	15.4
		222	0	0	0	14.8
		223	0	0	0	15.6
		224	0	0	0	15.7
		225	0	0	0	15.1
		AVG			0	15.32
		SD			0	0.370135
Y79-C5140-SH+miR-762inhibitor	2024.07.10	226	0	0	0	14.9
		227	0	0	0	15.8
		228	0	0	0	15.9
		229	0	0	0	15.4
		230	0	0	0	15.5
		AVG			0	15.5
		SD			0	0.3937

## Sheet: D6
项目编号：		KM20240603-LJH
动物入室时间：		2024.06.25
测量日期：		2024.07.16
细胞	接种时间	标号	右侧肿瘤			体重（g）
			最长径（mm）	最短径（mm）	肿瘤体积（mm3）
Y79-OE-NC	2024.07.10	201	3.62	1.63	4.80899	15.9
		202	3.67	1.43	3.75239	15.9
		203	3.43	1.55	4.12029	16.1
		204	3.38	1.52	3.90458	16.3
		205	3.67	1.39	3.5454	15.8
		AVG			4.02633	16
		SD			0.485422	0.2
Y79-C5140-OE	2024.07.10	206	6.27	2.03	12.919	16.3
		207	6.88	2.35	18.9974	16.5
		208	6.45	2.18	15.3265	16.5
		209	5.58	1.92	10.2851	16.3
		210	6.46	2.21	15.7756	16.7
		AVG			14.6607	16.46
		SD			3.26623	0.167332
Y79-C5140-OE+miR-762mimics	2024.07.10	211	5.02	1.98	9.8402	16.2
		212	4.45	2.32	11.9758	15.8
		213	3.57	2.66	12.6299	15.4
		214	3.89	2.3	10.289	15.5
		215	4.28	2.3	11.3206	15.5
		AVG			11.2111	15.68
		SD			1.15537	0.327109
Y79-SH-NC	2024.07.10	216	2.86	1.66	3.94051	15.9
		217	3.05	1.54	3.61669	16.2
		218	3.17	1.67	4.42041	15.6
		219	2.93	1.72	4.33406	16.1
		220	3.11	1.43	3.17982	15.6
		AVG			3.8983	15.88
		SD			0.514728	0.277489
Y79-C5140-SH	2024.07.10	221	1.75	1.34	1.57115	15.5
		222	2.75	1.47	2.97124	15.4
		223	3.03	1.53	3.54646	15.6
		224	2.24	1.45	2.3548	15.8
		225	2.08	1.37	1.95198	16.3
		AVG			2.47913	15.72
		SD			0.790435	0.356371
Y79-C5140-SH+miR-762inhibitor	2024.07.10	226	2.68	1.47	2.89561	15.1
		227	3.11	1.5	3.49875	15.9
		228	3.17	1.45	3.33246	16
		229	2.98	1.48	3.2637	15.5
		230	3.89	1.38	3.70406	15.9
		AVG			3.33891	15.68
		SD			0.300458	0.376829

## Sheet: D8
项目编号：		KM20240603-LJH
动物入室时间：		2024.06.25
测量日期：		2024.07.18
细胞	接种时间	标号	右侧肿瘤			体重（g）
			最长径（mm）	最短径（mm）	肿瘤体积（mm3）
Y79-OE-NC	2024.07.10	201	4.86	3.27	25.9837	16.3
		202	4.28	3.13	20.9654	16.5
		203	4.12	3.37	23.3952	16.4
		204	3.86	3.02	17.6024	16.3
		205	3.96	3	17.82	16.5
		AVG			21.1533	16.4
		SD			3.60953	0.1
Y79-C5140-OE	2024.07.10	206	12.32	3.92	94.657	16.9
		207	13.68	4.66	148.535	16.8
		208	12.63	4.06	104.094	17.6
		209	11.96	3.88	90.0253	17.2
		210	12.97	4.38	124.411	17.4
		AVG			112.344	17.18
		SD			24.1578	0.334664
Y79-C5140-OE+miR-762mimics	2024.07.10	211	7.85	4.37	74.9553	16.5
		212	7.45	3.26	39.5878	16.2
		213	7.54	4.56	78.3919	16.3
		214	7.65	3.88	57.5831	16.2
		215	7.63	4.1	64.1302	16.5
		AVG			62.9296	16.34
		SD			15.4804	0.151658
Y79-SH-NC	2024.07.10	216	4.67	3.78	33.3634	16.3
		217	4.11	3.46	24.6016	16.3
		218	5.37	3.47	32.3298	16.2
		219	5.45	3.59	35.1201	16.3
		220	5.24	3.79	37.6339	16.4
		AVG			32.6098	16.3
		SD			4.90715	0.0707107
Y79-C5140-SH	2024.07.10	221	2.96	2	5.92	16.3
		222	4.37	2.54	14.0967	16.3
		223	4.87	2.66	17.2291	16.4
		224	3.76	2.45	11.2847	16.6
		225	3.05	2.31	8.13755	16.3
		AVG			11.3336	16.38
		SD			4.52537	0.130384
Y79-C5140-SH+miR-762inhibitor	2024.07.10	226	4.35	3.65	28.9764	15.6
		227	4.31	3.67	29.0255	16.5
		228	4.38	3.58	28.0679	16.3
		229	4.35	3.67	29.2949	16.1
		230	5.81	3.52	35.9941	16.3
		AVG			30.2718	16.16
		SD			3.23217	0.343511

## Sheet: D10
项目编号：		KM20240603-LJH
动物入室时间：		2024.06.25
测量日期：		2024.07.20
细胞	接种时间	标号	右侧肿瘤			体重（g）
			最长径（mm）	最短径（mm）	肿瘤体积（mm3）
Y79-OE-NC	2024.07.10	201	6.03	4.91	72.6859	16.5
		202	5.95	4.52	60.7804	16.5
		203	5.75	4.84	67.3486	16.8
		204	5.14	4.68	56.2892	16.8
		205	5.76	4.41	56.0105	16.7
		AVG			62.6229	16.66
		SD			7.26001	0.151658
Y79-C5140-OE	2024.07.10	206	13.28	6.11	247.885	17.5
		207	14.33	6.75	326.455	17.6
		208	13.68	6.31	272.342	18.1
		209	13.03	5.93	229.099	17.4
		210	14.02	6.65	310	17.6
		AVG			277.156	17.64
		SD			40.9223	0.270185
Y79-C5140-OE+miR-762mimics	2024.07.10	211	10.12	5.37	145.915	16.8
		212	9.45	4.96	116.243	16.5
		213	9.86	5.82	166.991	16.7
		214	9.65	5	120.625	16.5
		215	9.86	5.21	133.82	16.9
		AVG			136.719	16.68
		SD			20.5405	0.178885
Y79-SH-NC	2024.07.10	216	6.47	4.65	69.9488	16.5
		217	5.9	4.37	56.3359	16.7
		218	6	4.38	57.5532	16.8
		219	6.51	4.68	71.2923	16.4
		220	6.39	4.68	69.9782	16.6
		AVG			65.0217	16.6
		SD			7.40584	0.158114
Y79-C5140-SH	2024.07.10	221	4.58	3.15	22.7225	16.3
		222	6.13	3.85	45.431	16.5
		223	6.86	4.05	56.2606	16.6
		224	6.34	3.6	41.0832	16.8
		225	5.02	3.55	31.6323	16.5
		AVG			39.4259	16.54
		SD			12.8643	0.181659
Y79-C5140-SH+miR-762inhibitor	2024.07.10	226	5.43	4.15	46.7591	16.2
		227	5.55	4.1	46.6478	16.6
		228	5.49	4.16	47.5039	16.8
		229	5.74	4.12	48.7165	16.7
		230	8.38	3.95	65.3745	16.5
		AVG			51.0003	16.56
		SD			8.07759	0.230217

## Sheet: D12
项目编号：		KM20240603-LJH
动物入室时间：		2024.06.25
测量日期：		2024.07.22
细胞	接种时间	标号	右侧肿瘤			体重（g）
			最长径（mm）	最短径（mm）	肿瘤体积（mm3）
Y79-OE-NC	2024.07.10	201	8.01	5.68	129.211	16.9
		202	7.09	5.09	91.8442	16.8
		203	7.18	5.67	115.415	17.2
		204	7.09	5.43	104.524	17.3
		205	8.15	5.23	111.463	17
		AVG			110.491	17.04
		SD			13.7743	0.207364
Y79-C5140-OE	2024.07.10	206	15.13	7.15	386.742	18.2
		207	15.84	8.13	523.487	18
		208	15.26	7.84	468.983	18.2
		209	14.83	7.02	365.414	17.9
		210	15.72	7.96	498.022	18.2
		AVG			448.53	18.1
		SD			69.3045	0.141421
Y79-C5140-OE+miR-762mimics	2024.07.10	211	12.27	6.63	269.676	17.4
		212	11.74	5.98	209.914	17.5
		213	12.05	6.85	282.708	17.6
		214	11.88	6.1	221.027	17.8
		215	12.05	6.32	240.653	17.5
		AVG			244.796	17.56
		SD			31.0452	0.151658
Y79-SH-NC	2024.07.10	216	8.66	5.43	127.67	16.9
		217	8.23	5.37	118.664	16.8
		218	8.13	5.51	123.414	17.2
		219	8.6	5.87	148.165	16.8
		220	8.71	5.37	125.585	16.9
		AVG			128.699	16.92
		SD			11.3832	0.164317
Y79-C5140-SH	2024.07.10	221	5.36	4	42.88	16.5
		222	8.67	4.75	97.8084	16.8
		223	8.96	4.87	106.252	16.9
		224	8.37	4.35	79.1907	16.9
		225	5.62	4.13	47.9299	16.8
		AVG			74.8121	16.78
		SD			28.6302	0.164317
Y79-C5140-SH+miR-762inhibitor	2024.07.10	226	8.7	5.12	114.033	16.5
		227	8.65	5.17	115.602	16.8
		228	8.64	5.1	112.363	16.9
		229	8.68	5.13	114.215	16.9
		230	11.54	4.86	136.285	16.8
		AVG			118.5	16.78
		SD			10.0085	0.164317

## Sheet: D14
项目编号：		KM20240603-LJH
动物入室时间：		2024.06.25
测量日期：		2024.07.24
细胞	接种时间	标号	右侧肿瘤			体重（g）
			最长径（mm）	最短径（mm）	肿瘤体积（mm3）
Y79-OE-NC	2024.07.10	201	8.17	7.37	221.885	17.7
		202	8.18	7.17	210.262	17.8
		203	8.87	7.04	219.806	17.9
		204	8.78	6.85	205.99	18
		205	9.68	6.55	207.648	17.6
		AVG			213.118	17.8
		SD			7.25368	0.158114
Y79-C5140-OE	2024.07.10	206	16.35	8.86	641.734	20.3
		207	16.85	9.45	752.374	20.8
		208	16.52	9.24	705.219	20.6
		209	15.93	8.75	609.82	19.8
		210	16.75	9.36	733.73	19.6
		AVG			688.575	20.22
		SD			60.792	0.511859
Y79-C5140-OE+miR-762mimics	2024.07.10	211	13.82	8.42	489.894	18.6
		212	13.25	7.98	421.883	18.4
		213	13.53	8.6	500.339	18.5
		214	13.53	8	432.96	18.6
		215	13.72	8.14	454.541	18.87
		AVG			459.923	18.594
		SD			34.4049	0.175157
Y79-SH-NC	2024.07.10	216	9.67	7.05	240.312	17.5
		217	9	7.06	224.296	17.6
		218	9.57	7	234.465	17.5
		219	9.25	7.27	244.445	17.6
		220	9.3	7.31	248.478	17.2
		AVG			238.399	17.48
		SD			9.43606	0.164317
Y79-C5140-SH	2024.07.10	221	6.13	4.26	55.6224	17.4
		222	9.62	5.45	142.869	17.6
		223	9.84	5.83	167.225	17.8
		224	9.25	5.13	121.716	17.6
		225	6.39	4.85	75.1544	17.5
		AVG			112.517	17.58
		SD			46.4538	0.148324
Y79-C5140-SH+miR-762inhibitor	2024.07.10	226	10.53	5.97	187.649	17.6
		227	10.48	5.89	181.787	17.5
		228	10.5	5.85	179.668	17.8
		229	10.48	5.9	182.404	17.6
		230	13.45	5.67	216.201	17.4
		AVG			189.542	17.58
		SD			15.1895	0.148324

## Sheet: D16
项目编号：		KM20240603-LJH
动物入室时间：		2024.06.25
测量日期：		2024.07.26
细胞	接种时间	标号	右侧肿瘤			体重（g）
			最长径（mm）	最短径（mm）	肿瘤体积（mm3）
Y79-OE-NC	2024.07.10	201	10.47	7.983	333.618	18.9
		202	10.74	7.54	305.293	19.2
		203	11.03	7.47	307.742	19.5
		204	11.08	7.37	300.916	19.7
		205	11.47	7.28	303.946	19.6
		AVG			310.303	19.38
		SD			13.2643	0.327109
Y79-C5140-OE	2024.07.10	206	17.34	9.43	770.979	21.8
		207	18.18	9.85	881.935	21.4
		208	17.75	9.67	829.891	21.5
		209	17.12	9.21	726.094	20.9
		210	17.94	9.78	857.966	20.8
		AVG			813.373	21.28
		SD			63.9862	0.420714
Y79-C5140-OE+miR-762mimics	2024.07.10	211	14.75	9.34	643.363	19.9
		212	14.13	9.15	591.499	20.1
		213	14.21	9.62	657.528	19.8
		214	14.48	9.17	608.804	20.3
		215	14.65	9.35	640.37	19.8
		AVG			628.313	19.98
		SD			27.2086	0.216795
Y79-SH-NC	2024.07.10	216	11.88	7.58	341.291	19.8
		217	11.28	7.36	305.517	20.1
		218	11.57	7.39	315.931	20.2
		219	11.86	7.62	344.322	19.8
		220	11.86	7.61	343.419	19.7
		AVG			330.096	19.92
		SD			18.0969	0.216795
Y79-C5140-SH	2024.07.10	221	6.65	4.62	70.9701	17.4
		222	9.53	6.27	187.326	18.9
		223	10	6.28	197.192	19.4
		224	8.83	6.43	182.538	18.5
		225	7.34	5.12	96.2068	17.8
		AVG			146.847	18.4
		SD			58.6701	0.809321
Y79-C5140-SH+miR-762inhibitor	2024.07.10	226	11.04	6.27	217.007	17.4
		227	10.95	6.24	213.183	19.9
		228	10.92	6.35	220.161	19.4
		229	10.93	6.26	214.16	18.5
		230	14.57	6	262.26	17.8
		AVG			225.354	18.6
		SD			20.8093	1.05119

## Sheet: D18
项目编号：		KM20240603-LJH
动物入室时间：		2024.06.25
测量日期：		2024.07.28
细胞	接种时间	标号	右侧肿瘤			体重（g）
			最长径（mm）	最短径（mm）	肿瘤体积（mm3）
Y79-OE-NC	2024.07.10	201	10.97	9.05	449.235	20.6
		202	10.74	8.97	432.075	20.6
		203	11.82	8.67	444.248	20.8
		204	11.34	8.53	412.554	20.6
		205	11.86	8.36	414.445	20.8
		AVG			430.512	20.68
		SD			16.7504	0.109545
Y79-C5140-OE	2024.07.10	206	18.63	9.67	871.035	22.5
		207	18.73	10.27	987.754	23.3
		208	18.82	9.95	931.614	22.9
		209	18.53	9.57	848.534	22.4
		210	18.37	10.1	936.962	23.1
		AVG			915.18	22.84
		SD			55.6819	0.384708
Y79-C5140-OE+miR-762mimics	2024.07.10	211	15.02	10.15	773.699	20.9
		212	14.58	9.65	678.863	21.1
		213	14.95	10.34	799.194	21.2
		214	14.85	9.7	698.618	20.7
		215	14.94	9.88	729.18	20.9
		AVG			735.911	20.96
		SD			50.3071	0.194936
Y79-SH-NC	2024.07.10	216	12.05	8.57	442.506	20.6
		217	11.98	8.52	434.816	20.5
		218	12.11	8.48	435.417	20.6
		219	12.05	8.45	430.2	20.7
		220	12.15	8.88	479.04	20.5
		AVG			444.396	20.58
		SD			19.8603	0.083666
Y79-C5140-SH	2024.07.10	221	6.93	4.8	79.8336	18.9
		222	9.72	6.73	220.123	19.6
		223	11.23	6.32	224.277	19.4
		224	9.21	6.85	216.078	19.4
		225	7.56	5.43	111.453	18.8
		AVG			170.353	19.22
		SD			69.1712	0.349285
Y79-C5140-SH+miR-762inhibitor	2024.07.10	226	11.34	6.56	244.001	19.4
		227	11.28	6.55	241.97	19.9
		228	11.27	6.53	240.281	19.4
		229	11.28	6.49	237.557	19.5
		230	15.38	6.27	302.316	19.8
		AVG			253.225	19.6
		SD			27.5441	0.234521

## Sheet: D21
项目编号：		KM20240603-LJH
动物入室时间：		2024.06.25
测量日期：		2024.07.31
细胞	接种时间	标号	右侧肿瘤			体重（g）	瘤重（g）
			最长径（mm）	最短径（mm）	肿瘤体积（mm3）
Y79-OE-NC	2024.07.10	201	11.86	9.61	547.648	22.8	0.41
		202	11.84	9.45	528.671	22.1	0.35
		203	12.37	9.32	537.244	22.4	0.38
		204	12.2	9.18	514.062	21.5	0.31
		205	12.43	8.98	501.18	21.1	0.33
		AVG			525.761	21.98	0.356
		SD			18.4422	0.683374	0.0397492
Y79-C5140-OE	2024.07.10	206	18.83	10.63	1063.87	24.2	0.7
		207	19.75	11.34	1269.88	25.6	1.06
		208	18.78	10.87	1109.49	24.7	0.75
		209	18.83	10.27	993.027	24.2	0.66
		210	18.81	10.89	1115.36	24.9	0.78
		AVG			1110.33	24.72	0.79
		SD			101.737	0.580517	0.157797
Y79-C5140-OE+miR-762mimics	2024.07.10	211	15.87	10.34	848.375	23.5	0.48
		212	15.12	10.12	774.253	23.4	0.37
		213	15.07	10.68	859.46	23.7	0.42
		214	15.64	10.33	834.464	23.6	0.39
		215	15.39	10.43	837.1	23.6	0.4
		AVG			830.73	23.56	0.412
		SD			33.0944	0.114018	0.0420714
Y79-SH-NC	2024.07.10	216	12.48	9.31	540.859	22.7	0.42
		217	12.26	9.17	515.465	21.8	0.36
		218	12.37	9.19	522.361	21.9	0.37
		219	12.38	9.26	530.778	22.6	0.33
		220	12.33	9.39	543.581	22.9	0.41
		AVG			530.609	22.38	0.378
		SD			11.945	0.496991	0.0370135
Y79-C5140-SH	2024.07.10	221	7.13	5.03	90.1977	20.2	0.1
		222	9.66	7.06	240.745	20.8	0.15
		223	12.12	6.43	250.55	20.3	0.18
		224	9.46	6.98	230.447	20.3	0.12
		225	7.44	5.75	122.993	20.1	0.14
		AVG			186.986	20.34	0.138
		SD			74.6365	0.270185	0.0303315
Y79-C5140-SH+miR-762inhibitor	2024.07.10	226	11.78	6.83	274.762	20.6	0.17
		227	11.58	6.88	274.066	21.3	0.19
		228	11.33	6.86	266.593	20.4	0.18
		229	11.46	6.85	268.866	20.6	0.18
		230	16.59	6.49	349.386	21.1	0.28
		AVG			286.735	20.8	0.2
		SD			35.1925	0.380789	0.0452769

[truncated: 1 more sheets: 空白]
